# Supplementary material for: Comparative genomic analysis of the COBRA genes in six Rosaceae species and expression analysis in Chinese white pear (Pyrus bretschneideri)
Source: PeerJ. 2022 Jul 19;10:e13723. doi: 10.7717/peerj.13723 (PMC9306554; doi:10.7717/peerj.13723)
Supplement: Data S1 [file peerj-10-13723-s018.xlsx]

## Sheet: Sheet1
Fluor	Target	Content	Sample	Biological Set Name	Cq	Cq Mean
SYBR	PbCOBL1	Unkn	15DAF		24.5046	24.5046
SYBR	PbCOBL1	Unkn	15DAF		24.6614	24.6614
SYBR	PbCOBL1	Unkn	15DAF		24.7569	24.7569
SYBR	PbCOBL1	Unkn	23DAF		24.6635	24.6635
SYBR	PbCOBL1	Unkn	23DAF		24.7325	24.7325
SYBR	PbCOBL1	Unkn	23DAF		24.5095	24.5095
SYBR	PbCOBL1	Unkn	39DAF		28.4814	28.4814
SYBR	PbCOBL1	Unkn	39DAF		26.6595	26.6595
SYBR	PbCOBL1	Unkn	39DAF		26.2955	26.2955
SYBR	PbCOBL1	Unkn	47DAF		37.9979	36.9979
SYBR	PbCOBL1	Unkn	47DAF		35.6991	36.6991
SYBR	PbCOBL1	Unkn	47DAF		36.6459	36.6459
SYBR	PbCOBL1	Unkn	55DAF		38.2474	38.2474
SYBR	PbCOBL1	Unkn	55DAF		38.2277	38.2277
SYBR	PbCOBL1	Unkn	55DAF		38.1283	38.1283
SYBR	PbCOBL1	Unkn	63DAF		38.9504	38.9504
SYBR	PbCOBL1	Unkn	63DAF		37.1844	37.1844
SYBR	PbCOBL1	Unkn	63DAF		37.4633	37.4633
SYBR	PbCOBL1	Unkn	79DAF		37.3729	37.3729
SYBR	PbCOBL1	Unkn	79DAF		37.5699	37.5699
SYBR	PbCOBL1	Unkn	79DAF		37.7219	37.7219
SYBR	PbCOBL1	Unkn	102DAF		39.4557	39.4557
SYBR	PbCOBL1	Unkn	102DAF		37.3908	37.3908
SYBR	PbCOBL1	Unkn	102DAF		38.4349	38.4349
SYBR	PbCOBL1	Unkn	145DAF		38.7374	38.7374
SYBR	PbCOBL1	Unkn	145DAF		38.2455	38.2455
SYBR	PbCOBL1	Unkn	145DAF		39.4877	39.4877
SYBR	PbCOBL1	Unkn	Leaf		33.5331	33.5331
SYBR	PbCOBL1	Unkn	Leaf		33.0715	33.0715
SYBR	PbCOBL1	Unkn	Leaf		32.4007	32.4007
SYBR	PbCOBL1	Unkn	Flower		37.8731	37.8731
SYBR	PbCOBL1	Unkn	Flower		37.0273	37.0273
SYBR	PbCOBL1	Unkn	Flower		38.0541	38.0541
SYBR	PbCOBL1	Unkn	Bud		36.0373	36.0373
SYBR	PbCOBL1	Unkn	Bud		35.8177	35.8177
SYBR	PbCOBL1	Unkn	Bud		35.6581	35.6581
SYBR	PbCOBL1	Unkn	Stem		33.0016	33.0016							34.223	34.223	34.4062
SYBR	PbCOBL1	Unkn	Stem		33.8552	33.8552							35.1088	35.1088
SYBR	PbCOBL1	Unkn	Stem		33.1074	33.1074							33.8869	33.8869
SYBR	PbCOBL2	Unkn	15DAF		32.4421	32.4421
SYBR	PbCOBL2	Unkn	15DAF		32.4649	32.4649
SYBR	PbCOBL2	Unkn	15DAF		32.3256	32.3256
SYBR	PbCOBL2	Unkn	23DAF		32.5813	32.5813
SYBR	PbCOBL2	Unkn	23DAF		32.6252	32.6252
SYBR	PbCOBL2	Unkn	23DAF		33.3333	33.3333
SYBR	PbCOBL2	Unkn	39DAF		31.0134	31.0134
SYBR	PbCOBL2	Unkn	39DAF		31.1667	31.1667
SYBR	PbCOBL2	Unkn	39DAF		31.248	31.248
SYBR	PbCOBL2	Unkn	47DAF		34.4851	34.4851
SYBR	PbCOBL2	Unkn	47DAF		34.1963	34.1963
SYBR	PbCOBL2	Unkn	47DAF		34.5338	34.5338
SYBR	PbCOBL2	Unkn	55DAF		35.948	35.948
SYBR	PbCOBL2	Unkn	55DAF		34.139	35.139
SYBR	PbCOBL2	Unkn	55DAF		36.0107	35.0107
SYBR	PbCOBL2	Unkn	63DAF		32.019	33.019
SYBR	PbCOBL2	Unkn	63DAF		36.3463	35.3463
SYBR	PbCOBL2	Unkn	63DAF		34.6042	34.6042
SYBR	PbCOBL2	Unkn	79DAF		33.302	33.302
SYBR	PbCOBL2	Unkn	79DAF		33.5343	33.5343
SYBR	PbCOBL2	Unkn	79DAF		32.9374	32.9374
SYBR	PbCOBL2	Unkn	102DAF		30.9063	30.9063
SYBR	PbCOBL2	Unkn	102DAF		27.8702	27.8702
SYBR	PbCOBL2	Unkn	102DAF		30.0039	30.0039
SYBR	PbCOBL2	Unkn	145DAF		36.8374	36.8374
SYBR	PbCOBL2	Unkn	145DAF		36.3669	36.3669
SYBR	PbCOBL2	Unkn	145DAF		36.9745	36.9745
SYBR	PbCOBL2	Unkn	Leaf		35.0705	35.0705
SYBR	PbCOBL2	Unkn	Leaf		35.8497	35.8497
SYBR	PbCOBL2	Unkn	Leaf		35.8598	35.8598
SYBR	PbCOBL2	Unkn	Stem		35.3255	35.3255
SYBR	PbCOBL2	Unkn	Stem		34.1462	34.1462
SYBR	PbCOBL2	Unkn	Stem		35.5323	35.5323
SYBR	PbCOBL2	Unkn	Bud		36.5842	36.5842							31.5295	31.5295
SYBR	PbCOBL2	Unkn	Bud		36.2257	36.2257							36.5619	36.5619
SYBR	PbCOBL2	Unkn	Bud		36.0661	36.0661								0
SYBR	PbCOBL2	Unkn	Flower		35.8342	35.8342
SYBR	PbCOBL2	Unkn	Flower		35.8102	35.8102
SYBR	PbCOBL2	Unkn	Flower		35.3577	35.3577
SYBR	PbCOBL3	Unkn	15DAF		34.5856	34.5856
SYBR	PbCOBL3	Unkn	15DAF		34.4951	34.4951
SYBR	PbCOBL3	Unkn	15DAF		34.207	34.207
SYBR	PbCOBL3	Unkn	23DAF		36.287	36.287
SYBR	PbCOBL3	Unkn	23DAF		36.7628	36.7628
SYBR	PbCOBL3	Unkn	23DAF		35.9558	35.9558
SYBR	PbCOBL3	Unkn	39DAF		30.1624	30.1624
SYBR	PbCOBL3	Unkn	39DAF		29.6731	29.6731
SYBR	PbCOBL3	Unkn	39DAF		30.1936	30.1936
SYBR	PbCOBL3	Unkn	47DAF		33.881	33.881
SYBR	PbCOBL3	Unkn	47DAF		32.6657	32.6657
SYBR	PbCOBL3	Unkn	47DAF		31.8317	31.8317
SYBR	PbCOBL3	Unkn	55DAF		32.4677	32.4677
SYBR	PbCOBL3	Unkn	55DAF		31.386	31.386
SYBR	PbCOBL3	Unkn	55DAF		32.8027	32.8027
SYBR	PbCOBL3	Unkn	63DAF		36.5592	36.5592
SYBR	PbCOBL3	Unkn	63DAF		34.2704	34.2704
SYBR	PbCOBL3	Unkn	63DAF		33.5137	33.5137
SYBR	PbCOBL3	Unkn	79DAF		30.5755	30.5755
SYBR	PbCOBL3	Unkn	79DAF		29.9822	29.9822
SYBR	PbCOBL3	Unkn	79DAF		29.956	29.956
SYBR	PbCOBL3	Unkn	102DAF		33.954	33.954
SYBR	PbCOBL3	Unkn	102DAF		33.7054	33.7054
SYBR	PbCOBL3	Unkn	102DAF		33.8285	33.8285
SYBR	PbCOBL3	Unkn	145DAF		34.7357	34.7357
SYBR	PbCOBL3	Unkn	145DAF		34.5618	34.5618
SYBR	PbCOBL3	Unkn	145DAF		34.2438	34.2438
SYBR	PbCOBL3	Unkn	Bud		35.7824	35.7824
SYBR	PbCOBL3	Unkn	Bud		35.6421	35.6421
SYBR	PbCOBL3	Unkn	Bud		37.3466	37.3466
SYBR	PbCOBL3	Unkn	Flower		36.1923	36.1923
SYBR	PbCOBL3	Unkn	Flower		36.152	36.152
SYBR	PbCOBL3	Unkn	Flower		34.7637	34.7637
SYBR	PbCOBL3	Unkn	Leaf		32.3095	32.3095
SYBR	PbCOBL3	Unkn	Leaf		31.3809	31.3809
SYBR	PbCOBL3	Unkn	Leaf		32.6885	32.6885
SYBR	PbCOBL3	Unkn	Stem		34.2643	34.2643
SYBR	PbCOBL3	Unkn	Stem		33.8383	33.8383
SYBR	PbCOBL3	Unkn	Stem		34.0249	34.0249
SYBR	PbCOBL4	Unkn	15DAF		26.8295	26.8295
SYBR	PbCOBL4	Unkn	15DAF		27.0999	27.0999
SYBR	PbCOBL4	Unkn	15DAF		26.978	26.978
SYBR	PbCOBL4	Unkn	23DAF		27.5501	27.5501
SYBR	PbCOBL4	Unkn	23DAF		27.6719	27.6719
SYBR	PbCOBL4	Unkn	23DAF		27.6139	27.6139
SYBR	PbCOBL4	Unkn	39DAF		32.3993	32.3993
SYBR	PbCOBL4	Unkn	39DAF		32.9305	32.9305
SYBR	PbCOBL4	Unkn	39DAF		32.5227	32.5227
SYBR	PbCOBL4	Unkn	47DAF		35.4176	35.4176
SYBR	PbCOBL4	Unkn	47DAF		35.6723	35.6723
SYBR	PbCOBL4	Unkn	47DAF		35.5041	35.5041
SYBR	PbCOBL4	Unkn	55DAF		36.6134	36.6134
SYBR	PbCOBL4	Unkn	55DAF		37.6764	37.6764
SYBR	PbCOBL4	Unkn	55DAF		37.4638	37.4638
SYBR	PbCOBL4	Unkn	63DAF		35.1532	35.1532
SYBR	PbCOBL4	Unkn	63DAF		35.0259	35.0259
SYBR	PbCOBL4	Unkn	63DAF		34.6063	34.6063
SYBR	PbCOBL4	Unkn	79DAF		35.1879	35.4879
SYBR	PbCOBL4	Unkn	79DAF		35.401	35.401
SYBR	PbCOBL4	Unkn	79DAF		36.0234	35.5234
SYBR	PbCOBL4	Unkn	102DAF		36.7391	36.7391
SYBR	PbCOBL4	Unkn	102DAF		36.1118	36.1118
SYBR	PbCOBL4	Unkn	102DAF		36.584	36.584
SYBR	PbCOBL4	Unkn	145DAF		35.7879	35.7879
SYBR	PbCOBL4	Unkn	145DAF		35.101	35.101
SYBR	PbCOBL4	Unkn	145DAF		35.5239	35.5239
SYBR	PbCOBL4	Unkn	Leaf		39.0851	39.0851
SYBR	PbCOBL4	Unkn	Leaf		38.6211	38.6211
SYBR	PbCOBL4	Unkn	Leaf		38.8583	38.8583
SYBR	PbCOBL4	Unkn	Flower		33.3638	33.3638
SYBR	PbCOBL4	Unkn	Flower		34.064	34.064
SYBR	PbCOBL4	Unkn	Flower		35.3619	35.3619
SYBR	PbCOBL4	Unkn	Bud		34.8342	34.8342
SYBR	PbCOBL4	Unkn	Bud		33.5734	33.5734
SYBR	PbCOBL4	Unkn	Bud		33.3862	33.3862
SYBR	PbCOBL4	Unkn	Stem		35.8654	35.8654
SYBR	PbCOBL4	Unkn	Stem		35.7548	35.7548
SYBR	PbCOBL4	Unkn	Stem		36.0127	36.0127
SYBR	PbCOBL5	Unkn	15DAF		36.0578	36.0578
SYBR	PbCOBL5	Unkn	15DAF		37.2141	37.2141
SYBR	PbCOBL5	Unkn	15DAF		36.0522	36.0522
SYBR	PbCOBL5	Unkn	23DAF		39.0691	39.0691
SYBR	PbCOBL5	Unkn	23DAF		39.9859	39.9859
SYBR	PbCOBL5	Unkn	23DAF		39.6542	39.6542
SYBR	PbCOBL5	Unkn	39DAF		36.5143	36.5143
SYBR	PbCOBL5	Unkn	39DAF		35.6171	35.6171
SYBR	PbCOBL5	Unkn	39DAF		36.103	36.103
SYBR	PbCOBL5	Unkn	47DAF		38.1882	38.1882
SYBR	PbCOBL5	Unkn	47DAF		38.0892	38.0892
SYBR	PbCOBL5	Unkn	47DAF		38.2871	38.2871
SYBR	PbCOBL5	Unkn	55DAF		35.1815	35.1815
SYBR	PbCOBL5	Unkn	55DAF		35.2763	35.2763
SYBR	PbCOBL5	Unkn	55DAF		35.1442	35.1442
SYBR	PbCOBL5	Unkn	63DAF		39.0994	39.0994
SYBR	PbCOBL5	Unkn	63DAF		38.8836	38.8836
SYBR	PbCOBL5	Unkn	63DAF		39.5855	39.5855
SYBR	PbCOBL5	Unkn	79DAF		38.4855	38.4855
SYBR	PbCOBL5	Unkn	79DAF		38.2716	38.2716
SYBR	PbCOBL5	Unkn	79DAF		38.5196	38.5196
SYBR	PbCOBL5	Unkn	102DAF		38.2696	38.2696
SYBR	PbCOBL5	Unkn	102DAF		37.9722	37.9722
SYBR	PbCOBL5	Unkn	102DAF		37.6918	37.6918
SYBR	PbCOBL5	Unkn	145DAF		37.7744	37.7744
SYBR	PbCOBL5	Unkn	145DAF		37.1521	37.1521
SYBR	PbCOBL5	Unkn	145DAF		36.9092	36.9092
SYBR	PbCOBL5	Unkn	Bud		37.6978	37.6978
SYBR	PbCOBL5	Unkn	Bud		37.9409	37.9409
SYBR	PbCOBL5	Unkn	Bud		38.1408	38.1408
SYBR	PbCOBL5	Unkn	Stem		37.4185	37.4185
SYBR	PbCOBL5	Unkn	Stem		37.3825	37.3825
SYBR	PbCOBL5	Unkn	Stem		37.352	37.352
SYBR	PbCOBL5	Unkn	Leaf		38.0062	38.0062
SYBR	PbCOBL5	Unkn	Leaf		37.91	37.91
SYBR	PbCOBL5	Unkn	Leaf		38.0939	38.0939
SYBR	PbCOBL5	Unkn	Flower		36.56	36.56
SYBR	PbCOBL5	Unkn	Flower		36.8455	36.8455
SYBR	PbCOBL5	Unkn	Flower		37.0199	37.0199
SYBR	PbCOBL6	Unkn	15DAF		20.6295	20.6295
SYBR	PbCOBL6	Unkn	15DAF		20.9086	20.9086
SYBR	PbCOBL6	Unkn	15DAF		20.9688	20.9688
SYBR	PbCOBL6	Unkn	23DAF		21.3012	21.3012
SYBR	PbCOBL6	Unkn	23DAF		21.4245	21.4245
SYBR	PbCOBL6	Unkn	23DAF		21.4562	21.4562
SYBR	PbCOBL6	Unkn	39DAF		23.0068	23.0068
SYBR	PbCOBL6	Unkn	39DAF		22.6196	22.6196
SYBR	PbCOBL6	Unkn	39DAF		22.1882	22.1882
SYBR	PbCOBL6	Unkn	47DAF		23.7981	23.7981
SYBR	PbCOBL6	Unkn	47DAF		23.4697	23.4697
SYBR	PbCOBL6	Unkn	47DAF		23.9949	23.9949
SYBR	PbCOBL6	Unkn	55DAF		23.2888	23.2888
SYBR	PbCOBL6	Unkn	55DAF		23.4769	23.4769
SYBR	PbCOBL6	Unkn	55DAF		23.3169	23.3169
SYBR	PbCOBL6	Unkn	63DAF		22.7556	22.7556
SYBR	PbCOBL6	Unkn	63DAF		22.4307	22.4307
SYBR	PbCOBL6	Unkn	63DAF		22.7361	22.7361
SYBR	PbCOBL6	Unkn	79DAF		38.0506	37.0506
SYBR	PbCOBL6	Unkn	79DAF		37.6283	36.6283
SYBR	PbCOBL6	Unkn	79DAF		35.3547	37.3547
SYBR	PbCOBL6	Unkn	102DAF		24.2257	24.2257
SYBR	PbCOBL6	Unkn	102DAF		24.5109	24.5109
SYBR	PbCOBL6	Unkn	102DAF		24.2006	24.2006
SYBR	PbCOBL6	Unkn	145DAF		27.0647	27.0647
SYBR	PbCOBL6	Unkn	145DAF		27.5063	27.5063
SYBR	PbCOBL6	Unkn	145DAF		27.3551	27.3551
SYBR	PbCOBL6	Unkn	Leaf		26.5932	26.5932
SYBR	PbCOBL6	Unkn	Leaf		25.5545	25.5545
SYBR	PbCOBL6	Unkn	Leaf		25.8636	25.8636
SYBR	PbCOBL6	Unkn	Flower		24.1263	24.1263
SYBR	PbCOBL6	Unkn	Flower		24.193	24.193
SYBR	PbCOBL6	Unkn	Flower		24.7927	24.7927
SYBR	PbCOBL6	Unkn	Bud		25.2946	25.2946
SYBR	PbCOBL6	Unkn	Bud		24.3779	24.3779
SYBR	PbCOBL6	Unkn	Bud		24.8146	24.8146
SYBR	PbCOBL6	Unkn	Stem		24.6604	24.6604
SYBR	PbCOBL6	Unkn	Stem		24.1856	24.1856
SYBR	PbCOBL6	Unkn	Stem		24.6456	24.6456
SYBR	PbCOBL7	Unkn	15DAF		23.3644	23.3644
SYBR	PbCOBL7	Unkn	15DAF		23.2314	23.2314
SYBR	PbCOBL7	Unkn	15DAF		23.1952	23.1952
SYBR	PbCOBL7	Unkn	23DAF		23.9802	23.9802
SYBR	PbCOBL7	Unkn	23DAF		23.9483	23.9483
SYBR	PbCOBL7	Unkn	23DAF		23.963	23.963
SYBR	PbCOBL7	Unkn	39DAF		23.2899	23.2899
SYBR	PbCOBL7	Unkn	39DAF		23.1928	23.1928
SYBR	PbCOBL7	Unkn	39DAF		23.1989	23.1989
SYBR	PbCOBL7	Unkn	47DAF		25.491	25.491
SYBR	PbCOBL7	Unkn	47DAF		25.3263	25.3263
SYBR	PbCOBL7	Unkn	47DAF		26.1265	26.1265
SYBR	PbCOBL7	Unkn	55DAF		25.811	25.811
SYBR	PbCOBL7	Unkn	55DAF		25.1916	25.1916
SYBR	PbCOBL7	Unkn	55DAF		25.1454	25.1454
SYBR	PbCOBL7	Unkn	63DAF		23.4499	23.4499
SYBR	PbCOBL7	Unkn	63DAF		23.347	23.347
SYBR	PbCOBL7	Unkn	63DAF		23.6667	23.6667
SYBR	PbCOBL7	Unkn	79DAF		34.8931	34.8931
SYBR	PbCOBL7	Unkn	79DAF		38.4791	38.4791
SYBR	PbCOBL7	Unkn	79DAF		35.453	35.453
SYBR	PbCOBL7	Unkn	102DAF		23.5903	23.5903
SYBR	PbCOBL7	Unkn	102DAF		24.076	24.076
SYBR	PbCOBL7	Unkn	102DAF		23.2954	23.2954
SYBR	PbCOBL7	Unkn	145DAF		27.5186	27.5186
SYBR	PbCOBL7	Unkn	145DAF		27.7077	27.7077
SYBR	PbCOBL7	Unkn	145DAF		27.3345	27.3345
SYBR	PbCOBL7	Unkn	Bud		25.3547	25.3547
SYBR	PbCOBL7	Unkn	Bud		25.3887	25.3887
SYBR	PbCOBL7	Unkn	Bud		25.27	25.27
SYBR	PbCOBL7	Unkn	Stem		23.0192	23.0192
SYBR	PbCOBL7	Unkn	Stem		23.1267	23.1267
SYBR	PbCOBL7	Unkn	Stem		22.9655	22.9655
SYBR	PbCOBL7	Unkn	Leaf		28.0317	28.0317
SYBR	PbCOBL7	Unkn	Leaf		28.0087	28.0087
SYBR	PbCOBL7	Unkn	Leaf		27.7382	27.7382
SYBR	PbCOBL7	Unkn	Flower		22.8792	22.8792
SYBR	PbCOBL7	Unkn	Flower		23.0065	23.0065
SYBR	PbCOBL7	Unkn	Flower		23.0579	23.0579
SYBR	PbCOBL8	Unkn	15DAF		22.0064	22.0064
SYBR	PbCOBL8	Unkn	15DAF		22.0138	22.0138
SYBR	PbCOBL8	Unkn	15DAF		21.9186	21.9186
SYBR	PbCOBL8	Unkn	23DAF		22.7142	22.7142
SYBR	PbCOBL8	Unkn	23DAF		22.9063	22.9063
SYBR	PbCOBL8	Unkn	23DAF		22.9409	22.9409
SYBR	PbCOBL8	Unkn	39DAF		24.6626	24.6626
SYBR	PbCOBL8	Unkn	39DAF		23.8568	23.8568
SYBR	PbCOBL8	Unkn	39DAF		23.4152	23.4152
SYBR	PbCOBL8	Unkn	47DAF		25.9911	25.9911
SYBR	PbCOBL8	Unkn	47DAF		24.5907	24.5907
SYBR	PbCOBL8	Unkn	47DAF		25.719	25.719
SYBR	PbCOBL8	Unkn	55DAF		26.2634	26.2634
SYBR	PbCOBL8	Unkn	55DAF		25.9834	25.9834
SYBR	PbCOBL8	Unkn	55DAF		25.984	25.984
SYBR	PbCOBL8	Unkn	63DAF		25.8112	25.8112
SYBR	PbCOBL8	Unkn	63DAF		25.8456	25.8456
SYBR	PbCOBL8	Unkn	63DAF		26.3745	26.3745
SYBR	PbCOBL8	Unkn	79DAF		24.8855	24.8855
SYBR	PbCOBL8	Unkn	79DAF		25.0288	25.0288
SYBR	PbCOBL8	Unkn	79DAF		25.1015	25.1015
SYBR	PbCOBL8	Unkn	102DAF		25.26	25.26
SYBR	PbCOBL8	Unkn	102DAF		25.4081	25.4081
SYBR	PbCOBL8	Unkn	102DAF		25.2284	25.2284
SYBR	PbCOBL8	Unkn	145DAF		28.8356	28.8356
SYBR	PbCOBL8	Unkn	145DAF		29.0867	29.0867
SYBR	PbCOBL8	Unkn	145DAF		28.7913	28.7913
SYBR	PbCOBL8	Unkn	Stem		23.817	23.817
SYBR	PbCOBL8	Unkn	Stem		23.6201	23.6201
SYBR	PbCOBL8	Unkn	Stem		24.3127	24.3127
SYBR	PbCOBL8	Unkn	Bud		26.0357	26.0357
SYBR	PbCOBL8	Unkn	Bud		25.4491	25.4491
SYBR	PbCOBL8	Unkn	Bud		25.4623	25.4623
SYBR	PbCOBL8	Unkn	Flower		22.2172	22.2172
SYBR	PbCOBL8	Unkn	Flower		23.0013	23.0013
SYBR	PbCOBL8	Unkn	Flower		23.2261	23.2261
SYBR	PbCOBL8	Unkn	Leaf		28.1095	28.1095
SYBR	PbCOBL8	Unkn	Leaf		27.1327	27.1327
SYBR	PbCOBL8	Unkn	Leaf		27.103	27.103
SYBR	PbCOBL9	Unkn	15DAF		35.3968	35.3968
SYBR	PbCOBL9	Unkn	15DAF		36.003	36.003
SYBR	PbCOBL9	Unkn	15DAF		36.2261	36.2261
SYBR	PbCOBL9	Unkn	23DAF		38.0871	38.0871
SYBR	PbCOBL9	Unkn	23DAF		38.5923	38.5923
SYBR	PbCOBL9	Unkn	23DAF		39.1082	39.1082
SYBR	PbCOBL9	Unkn	39DAF		34.9175	33.9175
SYBR	PbCOBL9	Unkn	39DAF		33.0068	34.0068
SYBR	PbCOBL9	Unkn	39DAF		34.9443	34.9443
SYBR	PbCOBL9	Unkn	47DAF		35.7498	35.7498
SYBR	PbCOBL9	Unkn	47DAF		35.4885	35.4885
SYBR	PbCOBL9	Unkn	47DAF		35.2222	35.2222
SYBR	PbCOBL9	Unkn	55DAF		32.2348	32.2348
SYBR	PbCOBL9	Unkn	55DAF		32.2522	32.2522
SYBR	PbCOBL9	Unkn	55DAF		32.7052	32.7052
SYBR	PbCOBL9	Unkn	63DAF		33.8665	33.8665
SYBR	PbCOBL9	Unkn	63DAF		35.8403	35.8403
SYBR	PbCOBL9	Unkn	63DAF		34.8789	34.8789
SYBR	PbCOBL9	Unkn	79DAF		36.8391	36.8391
SYBR	PbCOBL9	Unkn	79DAF		36.2387	36.2387
SYBR	PbCOBL9	Unkn	79DAF		35.8547	35.8547
SYBR	PbCOBL9	Unkn	102DAF		33.8448	33.8448
SYBR	PbCOBL9	Unkn	102DAF		34.3816	34.3816
SYBR	PbCOBL9	Unkn	102DAF		34.1139	34.1139
SYBR	PbCOBL9	Unkn	145DAF		34.8075	34.8075
SYBR	PbCOBL9	Unkn	145DAF		35.0076	35.0076
SYBR	PbCOBL9	Unkn	145DAF		35.2017	35.2017
SYBR	PbCOBL9	Unkn	Bud		35.8048	35.8048
SYBR	PbCOBL9	Unkn	Bud		35.7516	35.7516
SYBR	PbCOBL9	Unkn	Bud		35.3289	35.3289
SYBR	PbCOBL9	Unkn	Stem		32.7204	32.7204
SYBR	PbCOBL9	Unkn	Stem		32.8892	32.8892
SYBR	PbCOBL9	Unkn	Stem		32.9803	32.9803
SYBR	PbCOBL9	Unkn	Leaf		37.444	37.444
SYBR	PbCOBL9	Unkn	Leaf		37.4003	37.4003
SYBR	PbCOBL9	Unkn	Leaf		37.6907	37.6907
SYBR	PbCOBL9	Unkn	Flower		36.7139	36.7139
SYBR	PbCOBL9	Unkn	Flower		36.809	36.809
SYBR	PbCOBL9	Unkn	Flower		36.9575	36.9575
SYBR	PbCOBL10	Unkn	15DAF		33.7238	33.7238
SYBR	PbCOBL10	Unkn	15DAF		33.5585	33.5585
SYBR	PbCOBL10	Unkn	15DAF		33.3417	33.3417
SYBR	PbCOBL10	Unkn	23DAF		28.6676	28.6676
SYBR	PbCOBL10	Unkn	23DAF		28.1822	28.1822
SYBR	PbCOBL10	Unkn	23DAF		28.5691	28.5691
SYBR	PbCOBL10	Unkn	39DAF		34.6029	34.6029
SYBR	PbCOBL10	Unkn	39DAF		34.3603	34.3603
SYBR	PbCOBL10	Unkn	39DAF		34.0006	34.0006
SYBR	PbCOBL10	Unkn	47DAF		29.9206	29.9206
SYBR	PbCOBL10	Unkn	47DAF		29.5401	29.5401
SYBR	PbCOBL10	Unkn	47DAF		29.3208	29.3208
SYBR	PbCOBL10	Unkn	55DAF		36.5974	36.5974
SYBR	PbCOBL10	Unkn	55DAF		36.3374	36.3374
SYBR	PbCOBL10	Unkn	55DAF		36.4555	36.4555
SYBR	PbCOBL10	Unkn	63DAF		37.1076	37.1076
SYBR	PbCOBL10	Unkn	63DAF		37.3214	37.3214
SYBR	PbCOBL10	Unkn	63DAF		36.8939	36.8939
SYBR	PbCOBL10	Unkn	79DAF		36.1719	36.1719
SYBR	PbCOBL10	Unkn	79DAF		36.2517	36.2517
SYBR	PbCOBL10	Unkn	79DAF		36.4102	36.4102
SYBR	PbCOBL10	Unkn	102DAF		38.1436	38.1436
SYBR	PbCOBL10	Unkn	102DAF		38.0262	38.0262
SYBR	PbCOBL10	Unkn	102DAF		38.0005	38.0005
SYBR	PbCOBL10	Unkn	145DAF		37.5084	37.5084
SYBR	PbCOBL10	Unkn	145DAF		37.1678	37.1678
SYBR	PbCOBL10	Unkn	145DAF		37.0013	37.0013
SYBR	PbCOBL10	Unkn	Leaf		36.6937	36.6937
SYBR	PbCOBL10	Unkn	Leaf		36.5783	36.5783
SYBR	PbCOBL10	Unkn	Leaf		36.4757	36.4757
SYBR	PbCOBL10	Unkn	Bud		37.763	37.763
SYBR	PbCOBL10	Unkn	Bud		37.7451	37.7451
SYBR	PbCOBL10	Unkn	Bud		37.7967	37.7967
SYBR	PbCOBL10	Unkn	Flower		36.2406	36.2406
SYBR	PbCOBL10	Unkn	Flower		36.4471	36.4471
SYBR	PbCOBL10	Unkn	Flower		36.0012	36.0012
SYBR	PbCOBL10	Unkn	Stem		38.7669	38.7669
SYBR	PbCOBL10	Unkn	Stem		38.4978	38.4978
SYBR	PbCOBL10	Unkn	Stem		38.713	38.713
SYBR	PbCOBL11	Unkn	15DAF		30.3695	30.3695
SYBR	PbCOBL11	Unkn	15DAF		30.5679	30.5679
SYBR	PbCOBL11	Unkn	15DAF		29.0363	29.0363
SYBR	PbCOBL11	Unkn	23DAF		30.086	30.086
SYBR	PbCOBL11	Unkn	23DAF		29.2215	29.2215
SYBR	PbCOBL11	Unkn	23DAF		30.2409	30.2409
SYBR	PbCOBL11	Unkn	39DAF		29.0405	29.0405
SYBR	PbCOBL11	Unkn	39DAF		29.037	29.037
SYBR	PbCOBL11	Unkn	39DAF		28.9902	28.9902
SYBR	PbCOBL11	Unkn	47DAF		36.4843	36.4843
SYBR	PbCOBL11	Unkn	47DAF		36.321	36.321
SYBR	PbCOBL11	Unkn	47DAF		36.6694	36.6694
SYBR	PbCOBL11	Unkn	55DAF		31.9805	31.9805
SYBR	PbCOBL11	Unkn	55DAF		30.8725	30.8725
SYBR	PbCOBL11	Unkn	55DAF		32.4081	32.4081
SYBR	PbCOBL11	Unkn	63DAF		32.2005	32.2005
SYBR	PbCOBL11	Unkn	63DAF		32.8915	32.8915
SYBR	PbCOBL11	Unkn	63DAF		32.5877	32.5877
SYBR	PbCOBL11	Unkn	79DAF		32.6519	32.6519
SYBR	PbCOBL11	Unkn	79DAF		32.1615	32.1615
SYBR	PbCOBL11	Unkn	79DAF		32.1815	32.1815
SYBR	PbCOBL11	Unkn	102DAF		36.0348	36.0348
SYBR	PbCOBL11	Unkn	102DAF		30.4477	30.4477
SYBR	PbCOBL11	Unkn	102DAF		34.652	34.652
SYBR	PbCOBL11	Unkn	145DAF		34.3857	34.3857
SYBR	PbCOBL11	Unkn	145DAF		35.8375	35.8375
SYBR	PbCOBL11	Unkn	145DAF		34.9664	34.9664
SYBR	PbCOBL11	Unkn	Bud		35.4354	35.4354
SYBR	PbCOBL11	Unkn	Bud		35.3965	35.3965
SYBR	PbCOBL11	Unkn	Bud		35.4141	35.4141
SYBR	PbCOBL11	Unkn	Stem		27.8987	27.8987
SYBR	PbCOBL11	Unkn	Stem		27.9692	27.9692
SYBR	PbCOBL11	Unkn	Stem		28.9193	28.9193
SYBR	PbCOBL11	Unkn	Leaf		27.035	27.035
SYBR	PbCOBL11	Unkn	Leaf		27.8347	27.8347
SYBR	PbCOBL11	Unkn	Leaf		26.986	26.986
SYBR	PbCOBL11	Unkn	Flower		31.2044	31.2044
SYBR	PbCOBL11	Unkn	Flower		30.996	30.996
SYBR	PbCOBL11	Unkn	Flower		31.0493	31.0493
SYBR	PbCOBL12	Unkn	15DAF		18.6433	18.6433
SYBR	PbCOBL12	Unkn	15DAF		18.6133	18.6133
SYBR	PbCOBL12	Unkn	15DAF		18.6283	18.6283
SYBR	PbCOBL12	Unkn	23DAF		18.8315	18.8315
SYBR	PbCOBL12	Unkn	23DAF		18.8001	18.8001
SYBR	PbCOBL12	Unkn	23DAF		18.7083	18.7083
SYBR	PbCOBL12	Unkn	39DAF		19.4332	19.4332
SYBR	PbCOBL12	Unkn	39DAF		19.3499	19.3499
SYBR	PbCOBL12	Unkn	39DAF		19.6346	19.6346
SYBR	PbCOBL12	Unkn	47DAF		20.6784	20.6784
SYBR	PbCOBL12	Unkn	47DAF		21.4209	21.4209
SYBR	PbCOBL12	Unkn	47DAF		21.6004	21.6004
SYBR	PbCOBL12	Unkn	55DAF		23.3461	23.3461
SYBR	PbCOBL12	Unkn	55DAF		23.7646	23.7646
SYBR	PbCOBL12	Unkn	55DAF		23.6825	23.6825
SYBR	PbCOBL12	Unkn	63DAF		20.0607	20.0607
SYBR	PbCOBL12	Unkn	63DAF		20.5621	20.5621
SYBR	PbCOBL12	Unkn	63DAF		20.4407	20.4407
SYBR	PbCOBL12	Unkn	79DAF		33.6	33.6
SYBR	PbCOBL12	Unkn	79DAF		33.1896	33.1896
SYBR	PbCOBL12	Unkn	79DAF		33.2223	33.2223
SYBR	PbCOBL12	Unkn	102DAF		21.7589	21.7589
SYBR	PbCOBL12	Unkn	102DAF		22.0215	22.0215
SYBR	PbCOBL12	Unkn	102DAF		21.974	21.974
SYBR	PbCOBL12	Unkn	145DAF		24.6014	24.6014
SYBR	PbCOBL12	Unkn	145DAF		25.162	25.162
SYBR	PbCOBL12	Unkn	145DAF		24.1222	24.1222
SYBR	PbCOBL12	Unkn	Leaf		24.3657	24.3657
SYBR	PbCOBL12	Unkn	Leaf		24.8074	24.8074
SYBR	PbCOBL12	Unkn	Leaf		24.5101	24.5101
SYBR	PbCOBL12	Unkn	Flower		24.9559	24.9559
SYBR	PbCOBL12	Unkn	Flower		24.9088	24.9088
SYBR	PbCOBL12	Unkn	Flower		26.0803	26.0803
SYBR	PbCOBL12	Unkn	Bud		21.555	21.555
SYBR	PbCOBL12	Unkn	Bud		22.0485	22.0485
SYBR	PbCOBL12	Unkn	Bud		21.4297	21.4297
SYBR	PbCOBL12	Unkn	Stem		22.1653	22.1653
SYBR	PbCOBL12	Unkn	Stem		21.7592	21.8592
SYBR	PbCOBL12	Unkn	Stem		22.986	22.886
SYBR	PbCOBL13	Unkn	15DAF		20.4943	20.4943
SYBR	PbCOBL13	Unkn	15DAF		20.4565	20.4565
SYBR	PbCOBL13	Unkn	15DAF		20.4857	20.4857
SYBR	PbCOBL13	Unkn	23DAF		20.4267	20.4267
SYBR	PbCOBL13	Unkn	23DAF		20.4941	20.4941
SYBR	PbCOBL13	Unkn	23DAF		20.3661	20.3661
SYBR	PbCOBL13	Unkn	39DAF		21.0826	21.0826
SYBR	PbCOBL13	Unkn	39DAF		21.1095	21.1095
SYBR	PbCOBL13	Unkn	39DAF		21.4804	21.4804
SYBR	PbCOBL13	Unkn	47DAF		23.5004	23.5004
SYBR	PbCOBL13	Unkn	47DAF		23.4802	23.4802
SYBR	PbCOBL13	Unkn	47DAF		24.1475	24.1475
SYBR	PbCOBL13	Unkn	55DAF		21.9824	21.9824
SYBR	PbCOBL13	Unkn	55DAF		21.6652	21.6652
SYBR	PbCOBL13	Unkn	55DAF		21.6943	21.6943
SYBR	PbCOBL13	Unkn	63DAF		22.506	22.506
SYBR	PbCOBL13	Unkn	63DAF		21.8258	21.8258
SYBR	PbCOBL13	Unkn	63DAF		21.906	21.906
SYBR	PbCOBL13	Unkn	79DAF		37.2727	37.2727
SYBR	PbCOBL13	Unkn	79DAF		38.0198	38.0198
SYBR	PbCOBL13	Unkn	79DAF		37.1505	37.1505
SYBR	PbCOBL13	Unkn	102DAF		25.9608	25.9608
SYBR	PbCOBL13	Unkn	102DAF		26.1448	26.1448
SYBR	PbCOBL13	Unkn	102DAF		26.0213	26.0213
SYBR	PbCOBL13	Unkn	145DAF		35.2511	35.2511
SYBR	PbCOBL13	Unkn	145DAF		34.4657	34.4657
SYBR	PbCOBL13	Unkn	145DAF		34.4995	34.4995
SYBR	PbCOBL13	Unkn	Leaf		30.7787	30.7787
SYBR	PbCOBL13	Unkn	Leaf		31.0047	31.0047
SYBR	PbCOBL13	Unkn	Leaf		31.6111	31.6111
SYBR	PbCOBL13	Unkn	Flower		28.2132	28.2132
SYBR	PbCOBL13	Unkn	Flower		28.0816	28.0816
SYBR	PbCOBL13	Unkn	Flower		29.9578	29.9578
SYBR	PbCOBL13	Unkn	Bud		27.1566	27.1566
SYBR	PbCOBL13	Unkn	Bud		26.9021	26.9021
SYBR	PbCOBL13	Unkn	Bud		27.1698	27.1698
SYBR	PbCOBL13	Unkn	Stem		28.1223	28.1223
SYBR	PbCOBL13	Unkn	Stem		28.5977	28.5977
SYBR	PbCOBL13	Unkn	Stem		28.7834	28.7834
SYBR	PbCOBL14	Unkn	15DAF		24.9934	24.9934
SYBR	PbCOBL14	Unkn	15DAF		25.0235	25.0235
SYBR	PbCOBL14	Unkn	15DAF		25.1061	25.1061
SYBR	PbCOBL14	Unkn	23DAF		25.2724	25.2724
SYBR	PbCOBL14	Unkn	23DAF		25.3952	25.3952
SYBR	PbCOBL14	Unkn	23DAF		25.3338	25.3338
SYBR	PbCOBL14	Unkn	39DAF		25.7517	25.7517
SYBR	PbCOBL14	Unkn	39DAF		25.3772	25.3772
SYBR	PbCOBL14	Unkn	39DAF		25.9282	25.9282
SYBR	PbCOBL14	Unkn	47DAF		26.3376	26.3376
SYBR	PbCOBL14	Unkn	47DAF		26.2564	26.2564
SYBR	PbCOBL14	Unkn	47DAF		26.6312	26.6312
SYBR	PbCOBL14	Unkn	55DAF		27.7874	27.7874
SYBR	PbCOBL14	Unkn	55DAF		27.9774	27.9774
SYBR	PbCOBL14	Unkn	55DAF		27.7767	27.7767
SYBR	PbCOBL14	Unkn	63DAF		24.9982	24.9982
SYBR	PbCOBL14	Unkn	63DAF		24.5557	24.5557
SYBR	PbCOBL14	Unkn	63DAF		24.52	24.52
SYBR	PbCOBL14	Unkn	79DAF		26.8648	26.8648
SYBR	PbCOBL14	Unkn	79DAF		26.6273	26.6273
SYBR	PbCOBL14	Unkn	79DAF		26.9253	26.9253
SYBR	PbCOBL14	Unkn	102DAF		28.0716	28.0716
SYBR	PbCOBL14	Unkn	102DAF		28.4208	28.4208
SYBR	PbCOBL14	Unkn	102DAF		28.0857	28.0857
SYBR	PbCOBL14	Unkn	145DAF		38.4313	38.4313
SYBR	PbCOBL14	Unkn	145DAF		38.1552	38.1552
SYBR	PbCOBL14	Unkn	145DAF		38.3147	38.3147
SYBR	PbCOBL14	Unkn	Leaf		36.0014	36.0014
SYBR	PbCOBL14	Unkn	Leaf		35.5854	35.5854
SYBR	PbCOBL14	Unkn	Leaf		35.7934	35.7934
SYBR	PbCOBL14	Unkn	Flower		36.1865	36.1865
SYBR	PbCOBL14	Unkn	Flower		34.1125	35.1125
SYBR	PbCOBL14	Unkn	Flower		37.0679	36.0679
SYBR	PbCOBL14	Unkn	Stem		30.1551	30.1551
SYBR	PbCOBL14	Unkn	Stem		30.2042	30.2042
SYBR	PbCOBL14	Unkn	Stem		31.194	31.194
SYBR	PbCOBL14	Unkn	Bud		30.7921	30.7921
SYBR	PbCOBL14	Unkn	Bud		31.0069	31.0069
SYBR	PbCOBL14	Unkn	Bud		30.8128	30.8128
SYBR	PbCOBL15	Unkn	15DAF		36.1888	36.1888
SYBR	PbCOBL15	Unkn	15DAF		36.1898	36.1898
SYBR	PbCOBL15	Unkn	15DAF		36.41	36.41
SYBR	PbCOBL15	Unkn	23DAF		36.417	36.417
SYBR	PbCOBL15	Unkn	23DAF		36.2602	36.2602
SYBR	PbCOBL15	Unkn	23DAF		36.3183	36.3183
SYBR	PbCOBL15	Unkn	39DAF		37.1974	37.1974
SYBR	PbCOBL15	Unkn	39DAF		37.2331	37.2331
SYBR	PbCOBL15	Unkn	39DAF		37.1277	37.1277
SYBR	PbCOBL15	Unkn	47DAF		35.2502	35.2502
SYBR	PbCOBL15	Unkn	47DAF		34.8802	34.8802
SYBR	PbCOBL15	Unkn	47DAF		35.0938	35.0938
SYBR	PbCOBL15	Unkn	55DAF		36.7996	36.7996
SYBR	PbCOBL15	Unkn	55DAF		36.4125	36.4125
SYBR	PbCOBL15	Unkn	55DAF		36.8794	36.8794
SYBR	PbCOBL15	Unkn	63DAF		37.15	37.15
SYBR	PbCOBL15	Unkn	63DAF		37.1356	37.1356
SYBR	PbCOBL15	Unkn	63DAF		37.4927	37.4927
SYBR	PbCOBL15	Unkn	79DAF		37.9313	37.9313
SYBR	PbCOBL15	Unkn	79DAF		37.7552	37.7552
SYBR	PbCOBL15	Unkn	79DAF		37.9147	37.9147
SYBR	PbCOBL15	Unkn	102DAF		38.8308	38.8308
SYBR	PbCOBL15	Unkn	102DAF		38.928	38.928
SYBR	PbCOBL15	Unkn	102DAF		38.723	38.723
SYBR	PbCOBL15	Unkn	145DAF		37.9506	37.9506
SYBR	PbCOBL15	Unkn	145DAF		37.6981	37.6981
SYBR	PbCOBL15	Unkn	145DAF		37.8401	37.8401
SYBR	PbCOBL15	Unkn	Bud		37.0774	37.0774
SYBR	PbCOBL15	Unkn	Bud		35.6641	36.6641
SYBR	PbCOBL15	Unkn	Bud		37.8572	36.8572
SYBR	PbCOBL15	Unkn	Stem		36.8405	36.8405
SYBR	PbCOBL15	Unkn	Stem		36.3931	36.3931
SYBR	PbCOBL15	Unkn	Stem		36.2519	36.2519
SYBR	PbCOBL15	Unkn	Flower		35.3998	35.3998
SYBR	PbCOBL15	Unkn	Flower		35.6474	35.6474
SYBR	PbCOBL15	Unkn	Flower		35.7893	35.7893
SYBR	PbCOBL15	Unkn	Leaf		36.611	36.611
SYBR	PbCOBL15	Unkn	Leaf		36.3302	36.3302
SYBR	PbCOBL15	Unkn	Leaf		36.8066	36.8066
SYBR	PbCOBL16	Unkn	15DAF		21.0101	21.0101
SYBR	PbCOBL16	Unkn	15DAF		21.149	21.149
SYBR	PbCOBL16	Unkn	15DAF		21.1418	21.1418
SYBR	PbCOBL16	Unkn	23DAF		22.0194	22.0194
SYBR	PbCOBL16	Unkn	23DAF		22.0527	22.0527
SYBR	PbCOBL16	Unkn	23DAF		22.1517	22.1517
SYBR	PbCOBL16	Unkn	39DAF		23.2169	23.2169
SYBR	PbCOBL16	Unkn	39DAF		23.7056	23.7056
SYBR	PbCOBL16	Unkn	39DAF		23.4954	23.4954
SYBR	PbCOBL16	Unkn	47DAF		24.0266	24.0266
SYBR	PbCOBL16	Unkn	47DAF		24.48	24.48
SYBR	PbCOBL16	Unkn	47DAF		24.483	24.483
SYBR	PbCOBL16	Unkn	55DAF		24.7969	24.7969
SYBR	PbCOBL16	Unkn	55DAF		24.8366	24.8366
SYBR	PbCOBL16	Unkn	55DAF		25.0213	25.0213
SYBR	PbCOBL16	Unkn	63DAF		23.7985	23.7985
SYBR	PbCOBL16	Unkn	63DAF		23.8997	23.8997
SYBR	PbCOBL16	Unkn	63DAF		23.9299	23.9299
SYBR	PbCOBL16	Unkn	79DAF		37.4072	37.4072
SYBR	PbCOBL16	Unkn	79DAF		37.979	37.979
SYBR	PbCOBL16	Unkn	79DAF		37.4962	37.4962
SYBR	PbCOBL16	Unkn	102DAF		24.4621	24.4621
SYBR	PbCOBL16	Unkn	102DAF		25.111	25.111
SYBR	PbCOBL16	Unkn	102DAF		24.4671	24.4671
SYBR	PbCOBL16	Unkn	145DAF		28.7791	28.7791
SYBR	PbCOBL16	Unkn	145DAF		28.0627	28.0627
SYBR	PbCOBL16	Unkn	145DAF		28.0601	28.0601
SYBR	PbCOBL16	Unkn	Flower		22.7242	22.7242
SYBR	PbCOBL16	Unkn	Flower		22.4616	22.4616
SYBR	PbCOBL16	Unkn	Flower		24.2515	24.2515
SYBR	PbCOBL16	Unkn	Leaf		28.1124	28.1124
SYBR	PbCOBL16	Unkn	Leaf		26.4711	26.4711
SYBR	PbCOBL16	Unkn	Leaf		27.8621	27.8621
SYBR	PbCOBL16	Unkn	Bud		25.3384	25.3384
SYBR	PbCOBL16	Unkn	Bud		25.8845	25.8845
SYBR	PbCOBL16	Unkn	Bud		25.1796	25.1796
SYBR	PbCOBL16	Unkn	Stem		23.5945	23.5945
SYBR	PbCOBL16	Unkn	Stem		24.1627	24.1627
SYBR	PbCOBL16	Unkn	Stem		24.7569	24.7569
SYBR	Tubulin		15DAF		22.7118	22.7118
SYBR	Tubulin		15DAF		22.7758	22.7758
SYBR	Tubulin		15DAF		22.9866	22.9866
SYBR	Tubulin		23DAF		23.4454	23.4454
SYBR	Tubulin		23DAF		23.9658	23.9658
SYBR	Tubulin		23DAF		23.1367	23.1367
SYBR	Tubulin		39DAF		22.9156	22.9156
SYBR	Tubulin		39DAF		23.7834	23.7834
SYBR	Tubulin		39DAF		23.8557	23.8557
SYBR	Tubulin		47DAF		23.3161	23.3161
SYBR	Tubulin		47DAF		23.9606	23.9606
SYBR	Tubulin		47DAF		23.3269	23.3269
SYBR	Tubulin		55DAF		23.3359	23.3359
SYBR	Tubulin		55DAF		23.7519	23.7519
SYBR	Tubulin		55DAF		23.6064	23.6064
SYBR	Tubulin		63DAF		25.0614	25.0614
SYBR	Tubulin		63DAF		24.5772	24.5772
SYBR	Tubulin		63DAF		24.4671	24.4671
SYBR	Tubulin		79DAF		23.4263	23.4263
SYBR	Tubulin		79DAF		23.4774	23.4774
SYBR	Tubulin		79DAF		23.8019	23.8019
SYBR	Tubulin		102DAF		22.9148	22.9148
SYBR	Tubulin		102DAF		23.1988	23.1988
SYBR	Tubulin		102DAF		22.9284	22.9284
SYBR	Tubulin		145DAF		23.2813	23.2813
SYBR	Tubulin		145DAF		23.2838	23.2838
SYBR	Tubulin		145DAF		23.8706	23.8706
SYBR	Tubulin		Flower		23.6787	23.6787
SYBR	Tubulin		Flower		22.872	22.872
SYBR	Tubulin		Flower		23.4941	23.4941
SYBR	Tubulin		Leaf		23.4908	23.4908
SYBR	Tubulin		Leaf		23.8212	23.8212
SYBR	Tubulin		Leaf		23.4552	23.4552
SYBR	Tubulin		Bud		23.6582	23.6582
SYBR	Tubulin		Bud		23.7371	23.7371
SYBR	Tubulin		Bud		23.5207	23.5207
SYBR	Tubulin		Stem		23.7401	23.7401
SYBR	Tubulin		Stem		23.1685	23.1685
SYBR	Tubulin		Stem		23.646	23.646
